# Supplementary material for: Monitoring of riparian vegetation response to flood disturbances using terrestrial photography
Source: Copernicus journal article supplement (doi:10.5194/hess-19-195-2015), 2015-01-13
Supplement: Supplementary file 1 [file hess-19-195-2015-supplement-cover-letter.pdf › hess-19-195-2015-supplement-cover-letter.pdf]

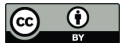

## *Supplement of*

# **Monitoring of riparian vegetation response to flood disturbances using terrestrial photography**

**K. Džubáková et al.**

*Correspondence to:* P. Molnar ([molnar@ifu.baug.ethz.ch](mailto:molnar@ifu.baug.ethz.ch))

- [hess-19-195-2015-supplement-cover-letter.pdf](#)
- SUPPLEMENT
  - REF\_IMG\_IR\_2008-05-28\_AFT.tiff
  - REF\_IMG\_IR\_2008-05-28\_BEF.tiff
  - REF\_IMG\_IR\_2009-06-06\_AFT.tiff
  - REF\_IMG\_IR\_2009-06-06\_BEF.tiff
  - REF\_IMG\_IR\_2009-07-17\_AFT.tiff
  - REF\_IMG\_IR\_2009-07-17\_BEF.tiff
  - REF\_IMG\_IR\_2010-06-12\_AFT.tiff
  - REF\_IMG\_IR\_2010-06-12\_BEF.tiff
  - REF\_IMG\_IR\_2011-07-13\_AFT.tiff
  - REF\_IMG\_IR\_2011-07-13\_BEF.tiff
  - REF\_IMG\_VIS\_2008-05-28\_AFT.tiff
  - REF\_IMG\_VIS\_2008-05-28\_BEF.tiff
  - REF\_IMG\_VIS\_2009-06-06\_AFT.tiff
  - REF\_IMG\_VIS\_2009-06-06\_BEF.tiff
  - REF\_IMG\_VIS\_2009-07-17\_AFT.tiff
  - REF\_IMG\_VIS\_2009-07-17\_BEF.tiff
  - REF\_IMG\_VIS\_2010-06-12\_AFT.tiff
  - REF\_IMG\_VIS\_2010-06-12\_BEF.tiff
  - REF\_IMG\_VIS\_2011-07-13\_AFT.tiff
  - REF\_IMG\_VIS\_2011-07-13\_BEF.tiff
